# Supplementary material for: Integrated Analysis of Copy Number Variation, Microsatellite Instability, and Tumor Mutation Burden Identifies an 11-Gene Signature Predicting Survival in Breast Cancer
Source: Front Cell Dev Biol. 2021 Sep 28;9:721505. doi: 10.3389/fcell.2021.721505 (PMC8505672; doi:10.3389/fcell.2021.721505)
Supplement: Supplementary Table 3 — The univariate Cox results of 130 DEGs. [file Table_3.XLSX]

## Sheet: Table. S3
Table S3. The univariate cox results of 130 DEGs
Gene	beta	HR	CI_lower	CI_upper	(95%_CI_for_HR)	wald.test	p.value	C-index
NPY	0.3	1.3	1.2	1.5	(1.2-1.5)	33	9.2e-09	0.625265
KLK3	0.35	1.4	1.2	1.6	(1.2-1.6)	26	3.8e-07	0.620134
CSF3	0.31	1.4	1.2	1.6	(1.2-1.6)	19	1.1e-05	0.618698
SST	0.24	1.3	1.1	1.4	(1.1-1.4)	14	0.00016	0.560586
OR6T1	-0.42	0.66	0.52	0.83	(0.52-0.83)	12	0.00048	0.584175
XIRP2	-0.5	0.6	0.45	0.8	(0.45-0.8)	12	0.00056	0.603142
C15orf43	0.15	1.2	1.1	1.3	(1.1-1.3)	8.9	0.0028	0.5636
FDCSP	0.24	1.3	1.1	1.5	(1.1-1.5)	7.7	0.0054	0.581487
FGF10	-0.25	0.78	0.65	0.94	(0.65-0.94)	7.2	0.0074	0.631475
ISX	0.2	1.2	1.1	1.4	(1.1-1.4)	7.1	0.0076	0.514701
VCX3A	0.18	1.2	1	1.4	(1-1.4)	6.8	0.0089	0.572457
PTH2	0.18	1.2	1	1.4	(1-1.4)	6.2	0.013	0.522459
IL36B	-0.37	0.69	0.51	0.93	(0.51-0.93)	6	0.014	0.539685
RIPPLY2	0.18	1.2	1	1.4	(1-1.4)	5.8	0.016	0.586058
C10orf71	-0.35	0.7	0.52	0.96	(0.52-0.96)	5	0.025	0.549346
XKR7	-0.29	0.75	0.59	0.97	(0.59-0.97)	5	0.026	0.570085
GC	0.12	1.1	1	1.2	(1-1.2)	4.7	0.031	0.517297
CARTPT	-0.25	0.78	0.62	0.99	(0.62-0.99)	4.4	0.037	0.556045
UGT2B4	-0.23	0.79	0.63	0.99	(0.63-0.99)	4.2	0.04	0.57432
IRS4	-0.28	0.76	0.58	0.99	(0.58-0.99)	4	0.046	0.54954
GABRA1	-0.25	0.78	0.61	1	(0.61-1)	3.7	0.055	0.538545
SERPINB4	0.15	1.2	1	1.4	(1-1.4)	3.7	0.055	0.550853
SCGB1A1	0.15	1.2	1	1.4	(1-1.4)	3.6	0.056	0.554518
SCRT2	-0.29	0.75	0.56	1	(0.56-1)	3.6	0.057	0.552014
MEPE	-0.19	0.83	0.68	1	(0.68-1)	3.4	0.064	0.541762
SLC4A4	-0.19	0.82	0.67	1	(0.67-1)	3.4	0.066	0.569036
CPLX2	-0.23	0.8	0.62	1	(0.62-1)	3.3	0.071	0.535582
GPR115	-0.16	0.85	0.7	1	(0.7-1)	3	0.082	0.550609
SLC30A8	-0.16	0.85	0.71	1	(0.71-1)	3	0.082	0.561299
ADH7	-0.25	0.78	0.59	1	(0.59-1)	2.9	0.09	0.505874
GRIA2	-0.16	0.86	0.71	1	(0.71-1)	2.9	0.091	0.568405
MUCL1	0.15	1.2	0.98	1.4	(0.98-1.4)	2.8	0.092	0.537252
UCP1	0.14	1.1	0.97	1.4	(0.97-1.4)	2.8	0.097	0.538769
MYL1	-0.26	0.77	0.57	1	(0.57-1)	2.7	0.098	0.521573
SPRR4	-0.3	0.74	0.52	1.1	(0.52-1.1)	2.7	0.099	0.527519
MYL7	0.14	1.2	0.97	1.4	(0.97-1.4)	2.7	0.1	0.532782
SEZ6	-0.17	0.84	0.68	1	(0.68-1)	2.4	0.12	0.5805
AMER3	-0.18	0.83	0.66	1	(0.66-1)	2.4	0.12	0.538697
ALDH3A1	0.13	1.1	0.97	1.3	(0.97-1.3)	2.4	0.13	0.578107
CSRP3	-0.18	0.84	0.66	1.1	(0.66-1.1)	2.2	0.14	0.521868
RFX4	-0.15	0.86	0.71	1.1	(0.71-1.1)	2.1	0.15	0.501792
FGA	0.11	1.1	0.96	1.3	(0.96-1.3)	2.1	0.15	0.546333
LBP	0.11	1.1	0.95	1.3	(0.95-1.3)	1.9	0.16	0.54672
ALB	0.12	1.1	0.96	1.3	(0.96-1.3)	2	0.16	0.569046
FGF4	-0.19	0.83	0.63	1.1	(0.63-1.1)	1.9	0.17	0.537496
SPINT3	0.089	1.1	0.96	1.2	(0.96-1.2)	1.8	0.17	0.506343
ERN2	-0.14	0.87	0.72	1.1	(0.72-1.1)	1.9	0.17	0.506791
KLHL1	-0.15	0.86	0.69	1.1	(0.69-1.1)	1.8	0.17	0.536457
ADAM7	0.11	1.1	0.95	1.3	(0.95-1.3)	1.8	0.18	0.507463
GABRG2	-0.16	0.85	0.68	1.1	(0.68-1.1)	1.8	0.18	0.515556
C8B	0.098	1.1	0.95	1.3	(0.95-1.3)	1.7	0.19	0.555821
REG1A	0.096	1.1	0.95	1.3	(0.95-1.3)	1.7	0.19	0.516116
GNAT3	-0.14	0.87	0.7	1.1	(0.7-1.1)	1.7	0.19	0.5141
ADAM2	0.11	1.1	0.94	1.3	(0.94-1.3)	1.6	0.2	0.524118
LALBA	-0.14	0.87	0.69	1.1	(0.69-1.1)	1.6	0.2	0.491448
GKN2	-0.13	0.88	0.72	1.1	(0.72-1.1)	1.7	0.2	0.552065
UGT1A7	-0.15	0.86	0.67	1.1	(0.67-1.1)	1.5	0.22	0.514681
BPIFA1	-0.12	0.89	0.73	1.1	(0.73-1.1)	1.4	0.24	0.518946
PCSK1	-0.12	0.89	0.73	1.1	(0.73-1.1)	1.4	0.25	0.545264
PAX7	-0.11	0.9	0.75	1.1	(0.75-1.1)	1.2	0.27	0.532915
OR5M11	0.091	1.1	0.93	1.3	(0.93-1.3)	1.2	0.27	0.492649
CYP2A7	-0.1	0.9	0.75	1.1	(0.75-1.1)	1.2	0.28	0.529453
LBX1	-0.11	0.9	0.73	1.1	(0.73-1.1)	1.1	0.3	0.523273
DCD	0.089	1.1	0.92	1.3	(0.92-1.3)	1	0.31	0.533597
CRCT1	0.074	1.1	0.93	1.2	(0.93-1.2)	0.99	0.32	0.524342
TMEM196	-0.1	0.9	0.73	1.1	(0.73-1.1)	0.95	0.33	0.516941
PNLIPRP3	0.078	1.1	0.92	1.3	(0.92-1.3)	0.93	0.33	0.510323
CHGA	0.078	1.1	0.91	1.3	(0.91-1.3)	0.83	0.36	0.524322
CLCA2	-0.084	0.92	0.77	1.1	(0.77-1.1)	0.85	0.36	0.515251
KLK14	0.077	1.1	0.91	1.3	(0.91-1.3)	0.81	0.37	0.547972
TEX15	-0.088	0.92	0.75	1.1	(0.75-1.1)	0.8	0.37	0.5259
CHAT	-0.1	0.9	0.72	1.1	(0.72-1.1)	0.79	0.38	0.491642
LRRC53	-0.093	0.91	0.74	1.1	(0.74-1.1)	0.78	0.38	0.555027
C6orf15	0.072	1.1	0.92	1.3	(0.92-1.3)	0.77	0.38	0.543879
CGB5	0.06	1.1	0.92	1.2	(0.92-1.2)	0.72	0.4	0.52086
OLFM3	-0.092	0.91	0.73	1.1	(0.73-1.1)	0.68	0.41	0.473224
GABRA2	0.076	1.1	0.9	1.3	(0.9-1.3)	0.69	0.41	0.476421
ARPP21	0.07	1.1	0.91	1.3	(0.91-1.3)	0.68	0.41	0.488139
ZFY	0.058	1.1	0.92	1.2	(0.92-1.2)	0.66	0.42	0.521074
CLVS2	-0.08	0.92	0.75	1.1	(0.75-1.1)	0.58	0.44	0.525707
XAGE5	0.055	1.1	0.92	1.2	(0.92-1.2)	0.6	0.44	0.518448
CA6	0.061	1.1	0.91	1.2	(0.91-1.2)	0.58	0.45	0.529025
MPPED1	0.061	1.1	0.91	1.2	(0.91-1.2)	0.56	0.45	0.524403
MAGEB16	0.059	1.1	0.91	1.2	(0.91-1.2)	0.57	0.45	0.506526
FGG	0.062	1.1	0.9	1.3	(0.9-1.3)	0.53	0.47	0.545081
CUX2	0.061	1.1	0.89	1.3	(0.89-1.3)	0.48	0.49	0.506027
CSN1S1	-0.057	0.94	0.8	1.1	(0.8-1.1)	0.45	0.5	0.526277
SBSN	0.059	1.1	0.89	1.3	(0.89-1.3)	0.45	0.5	0.556229
GABRA4	-0.057	0.94	0.8	1.1	(0.8-1.1)	0.43	0.51	0.523986
C20orf85	-0.058	0.94	0.79	1.1	(0.79-1.1)	0.43	0.51	0.54113
SMR3B	-0.058	0.94	0.79	1.1	(0.79-1.1)	0.43	0.51	0.5248
FRG2B	-0.071	0.93	0.75	1.2	(0.75-1.2)	0.43	0.51	0.542138
MMP26	-0.055	0.95	0.8	1.1	(0.8-1.1)	0.41	0.52	0.516758
MAGEA10	-0.061	0.94	0.77	1.1	(0.77-1.1)	0.37	0.55	0.492191
CGA	0.048	1	0.88	1.2	(0.88-1.2)	0.3	0.58	0.502362
CA10	-0.053	0.95	0.79	1.1	(0.79-1.1)	0.3	0.58	0.493942
HAO2	0.042	1	0.9	1.2	(0.9-1.2)	0.3	0.59	0.514783
SLC18A3	-0.068	0.93	0.73	1.2	(0.73-1.2)	0.28	0.59	0.51859
BPIFB3	-0.045	0.96	0.81	1.1	(0.81-1.1)	0.27	0.6	0.47411
CCKBR	0.045	1	0.88	1.2	(0.88-1.2)	0.26	0.61	0.545997
TRIM49B	-0.048	0.95	0.79	1.1	(0.79-1.1)	0.26	0.61	0.509417
SYT4	-0.053	0.95	0.77	1.2	(0.77-1.2)	0.25	0.62	0.512166
ZFP42	0.04	1	0.88	1.2	(0.88-1.2)	0.23	0.63	0.537842
NCAN	-0.036	0.96	0.81	1.1	(0.81-1.1)	0.17	0.68	0.477745
CSN2	-0.035	0.97	0.82	1.1	(0.82-1.1)	0.16	0.69	0.487549
ENSG00000258417	-0.036	0.96	0.8	1.2	(0.8-1.2)	0.15	0.7	0.499216
MAGEB2	-0.036	0.96	0.79	1.2	(0.79-1.2)	0.13	0.72	0.504011
CTNNA2	0.03	1	0.87	1.2	(0.87-1.2)	0.12	0.73	0.467442
PAGE1	0.033	1	0.86	1.2	(0.86-1.2)	0.12	0.73	0.493301
LCE3D	0.03	1	0.87	1.2	(0.87-1.2)	0.12	0.73	0.529636
TRH	-0.03	0.97	0.82	1.2	(0.82-1.2)	0.12	0.73	0.51917
ACE2	-0.026	0.97	0.82	1.2	(0.82-1.2)	0.09	0.77	0.487294
LHFPL4	-0.025	0.98	0.82	1.2	(0.82-1.2)	0.08	0.78	0.493067
SPANXC	0.022	1	0.87	1.2	(0.87-1.2)	0.07	0.79	0.528914
ANKRD66	-0.021	0.98	0.82	1.2	(0.82-1.2)	0.06	0.81	0.516676
CARD18	-0.024	0.98	0.81	1.2	(0.81-1.2)	0.06	0.81	0.490837
NEUROD1	0.019	1	0.86	1.2	(0.86-1.2)	0.05	0.83	0.514823
KRT20	-0.019	0.98	0.82	1.2	(0.82-1.2)	0.04	0.83	0.528221
UCN3	0.022	1	0.84	1.2	(0.84-1.2)	0.05	0.83	0.473927
DCAF4L2	0.018	1	0.85	1.2	(0.85-1.2)	0.04	0.84	0.49435
DPPA2	-0.016	0.98	0.81	1.2	(0.81-1.2)	0.03	0.87	0.489412
ADRB1	-0.014	0.99	0.82	1.2	(0.82-1.2)	0.02	0.88	0.506791
GJD2	0.012	1	0.87	1.2	(0.87-1.2)	0.02	0.88	0.511932
COX7B2	0.013	1	0.86	1.2	(0.86-1.2)	0.02	0.88	0.50842
FAM150A	-0.011	0.99	0.83	1.2	(0.83-1.2)	0.02	0.9	0.499094
MAGEA1	-0.012	0.99	0.82	1.2	(0.82-1.2)	0.02	0.9	0.515872
GAGE1	0.01	1	0.8	1.3	(0.8-1.3)	0.01	0.93	0.502128
CHGB	0.0068	1	0.84	1.2	(0.84-1.2)	0.01	0.94	0.530461
BPIFB2	0.0048	1	0.85	1.2	(0.85-1.2)	0	0.96	0.493016
LGI1	0.0015	1	0.84	1.2	(0.84-1.2)	0	0.99	0.51691

## Sheet: Table. S4
Table. S4 The coefficients of 11 gene involved in GVRM
Tags	coeficient
FGF10	-0.00761783
CSF3	0.0210207
NPY	0.0287663
KLK3	0.0125461
SST	0.0158409
XIRP2	-0.0249884
C15orf43	0.0274636
VCX3A	0.0124418
ISX	0.00651268
OR6T1	-0.0343138
FDCSP	0.000402441
